# Supplementary material for: Enzymatic activities and analysis of a mycelium-based composite formation using peach palm (Bactris gasipaes) residues on Lentinula edodes
Source: Research Square preprint supplement (doi:10.21203/rs.3.rs-50750/v2), 2020-10-24
Supplement: Supplementary file 1 [file 46d6f30480f8cb9ad6091b77.docx]

Supplemental Information

***Enzymatic activities and analysis of a mycelium-based composite formation using peach palm (Bactris gasipaes) residues on Lentinula edodes***

Gabriel Goetten de Lima a-b *, Zaira Chiodini Pedri Schoenherr c, Washington Luiz Esteves Magalhães a,d,Lorena Benathar Ballod Tavares c, Cristiane Vieira Helm d

a Programa de Pós-Graduação em Engenharia e Ciência dos Materiais - PIPE, Universidade Federal do Paraná, Curitiba, Paraná, Brazil

b Materials Research Institute, Athlone Institute of Technology, Athlone, Ireland

c Programa de Pós-Graduação em Engenharia Ambiental - PPGEA, Universidade Regional de Blumenau, Blumenau, Santa Catarina, Brazil

d Embrapa Florestas, Colombo, Brazil

* corresponding author: [ggoetten@research.ait.ie](mailto:ggoetten@research.ait.ie)


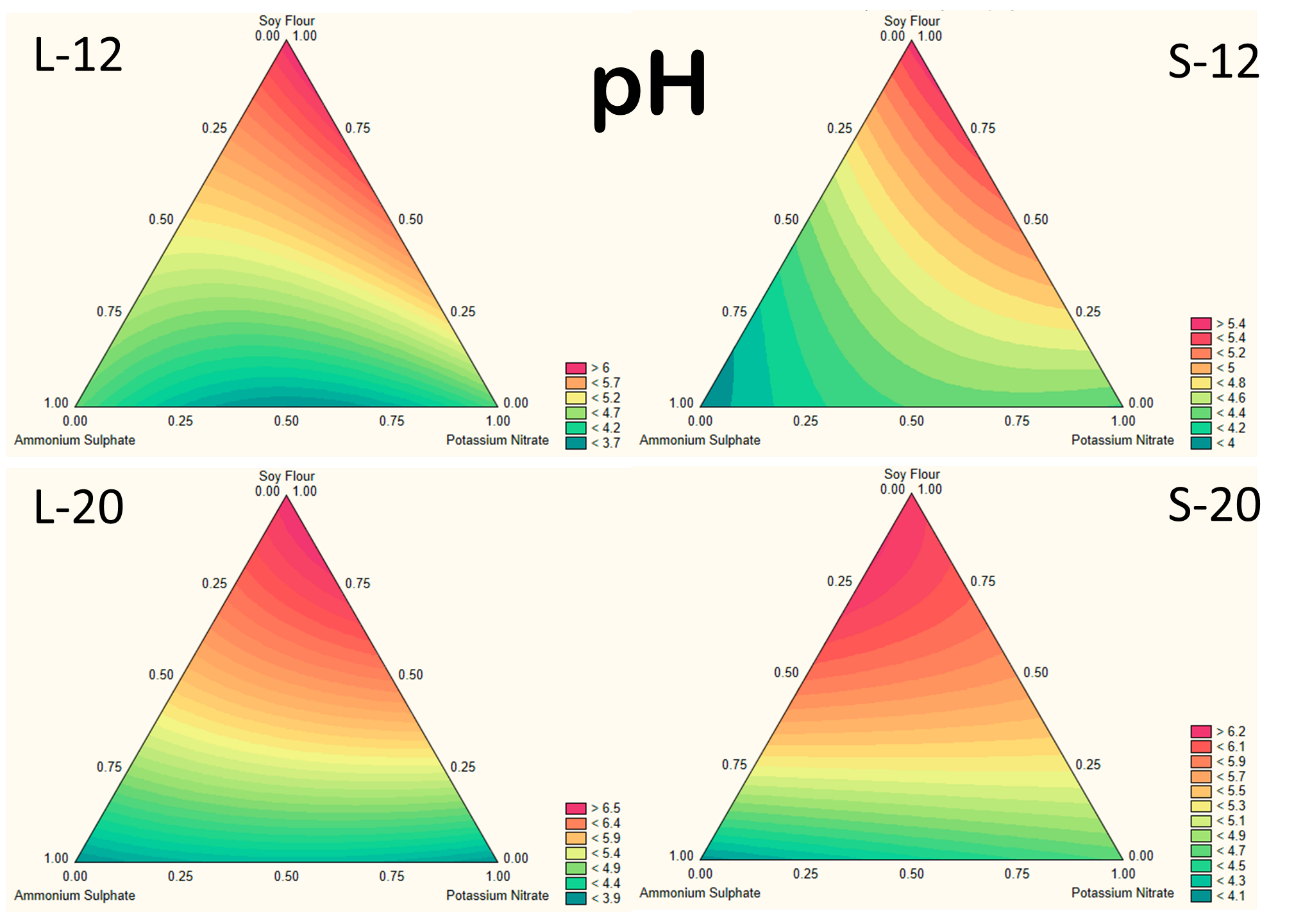


**Fig. A.1.** Surface contour plot of pH evaluation under different treatments using the studied inoculum solid (S) or liquid (L) and time periods of 12 and 20 days.


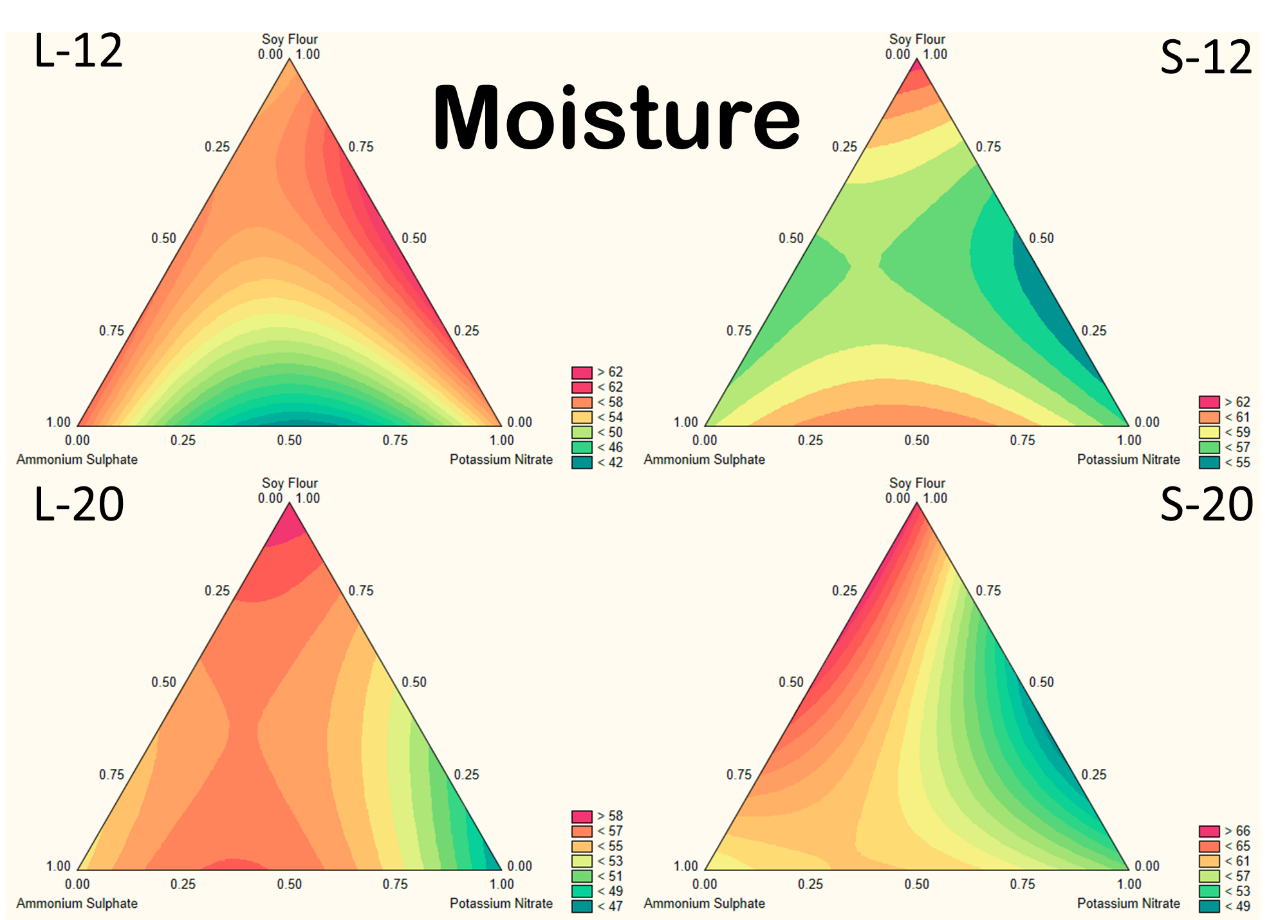


**Fig. S.2.** Surface contour plot of Moisture evaluation under different treatments using the studied inoculum solid (S) or liquid (L) and time periods of 12 and 20 days.


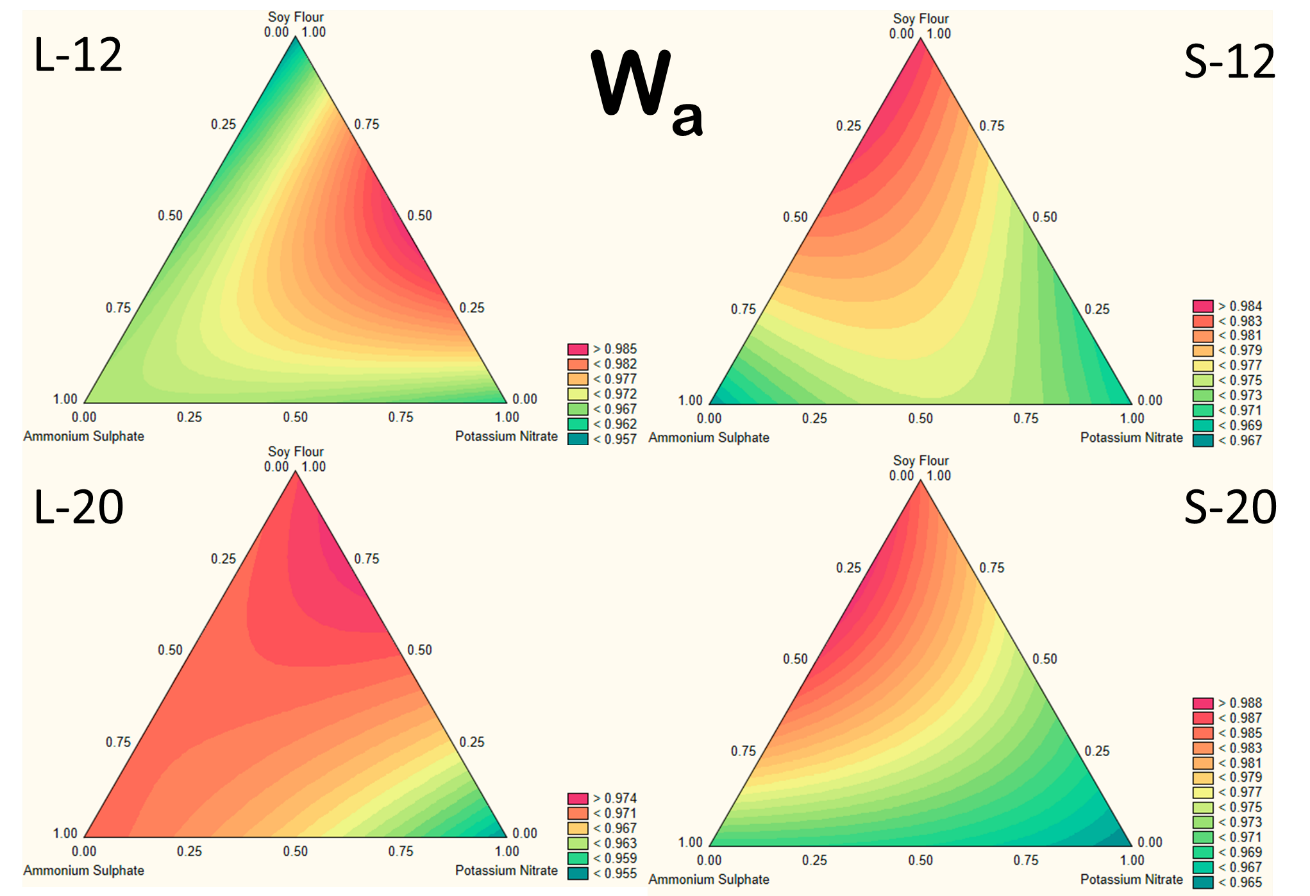


**Fig. S.3.** Surface contour plot of Wa evaluation under different treatments using the studied inoculum solid (S) or liquid (L) and time periods of 12 and 20 days.


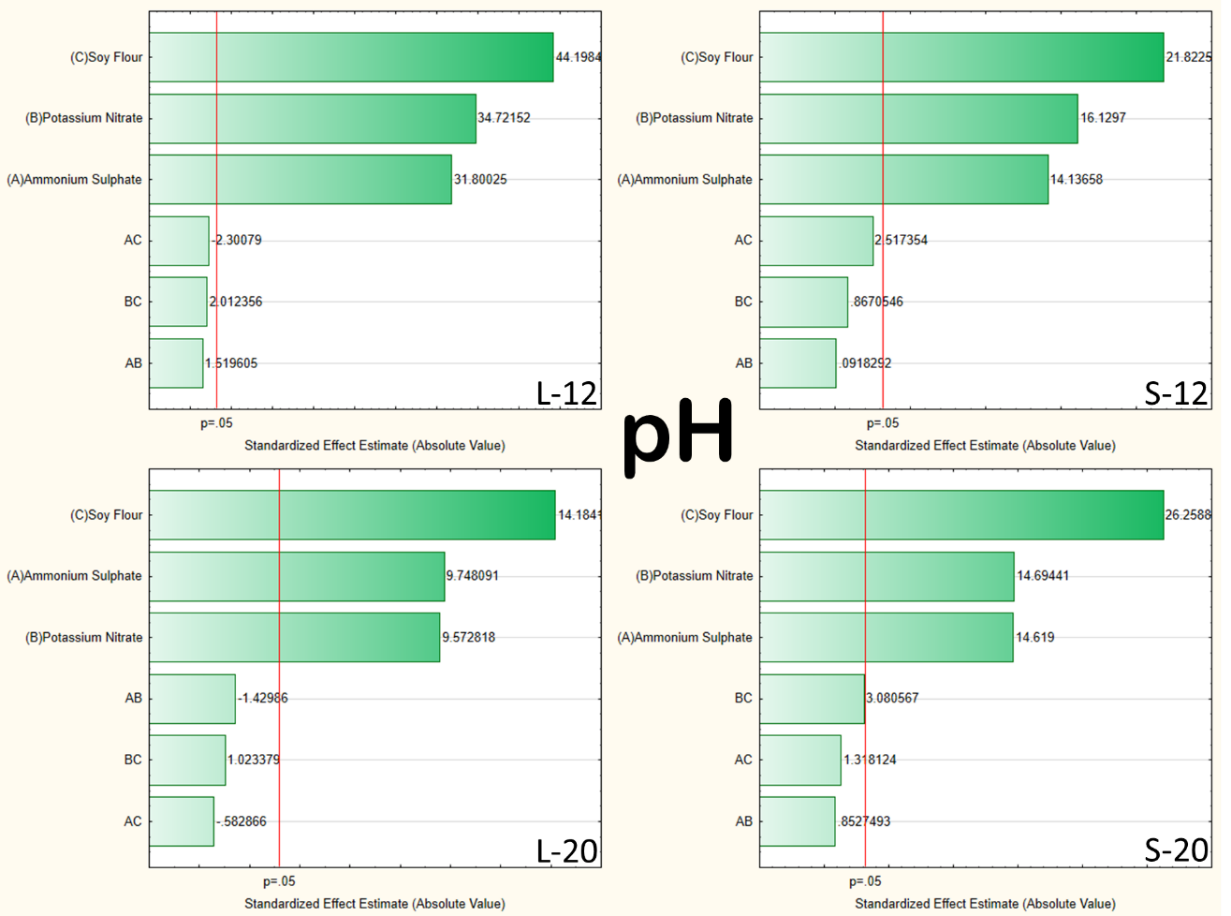


**Fig. S.4.** Pareto diagram for the studied treatments influence on pH values using inoculum solid (S) or liquid (L) and time periods of 12 and 20 days


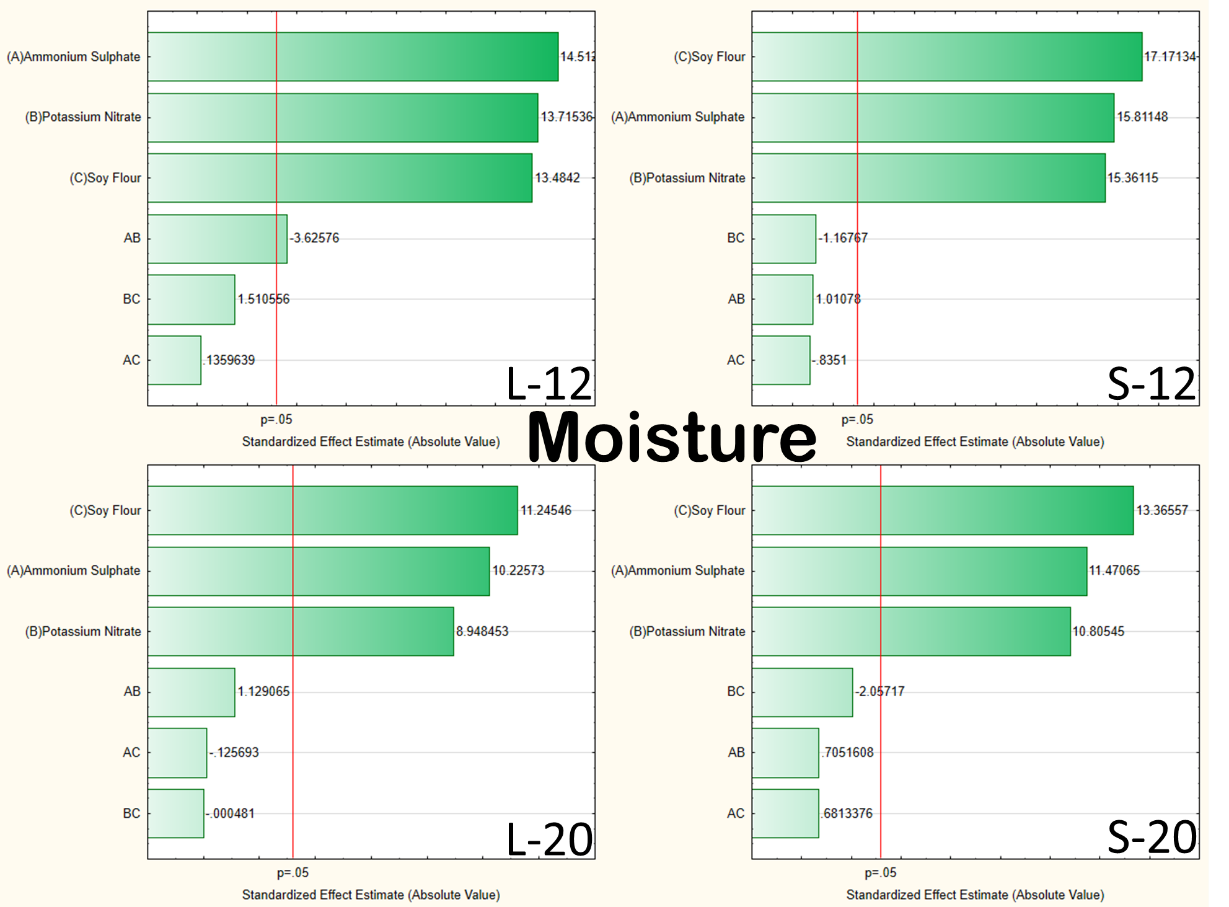


**Fig. S.5.** Pareto diagram for the studied treatments influence on moisture values using inoculum solid (S) or liquid (L) and time periods of 12 and 20 days


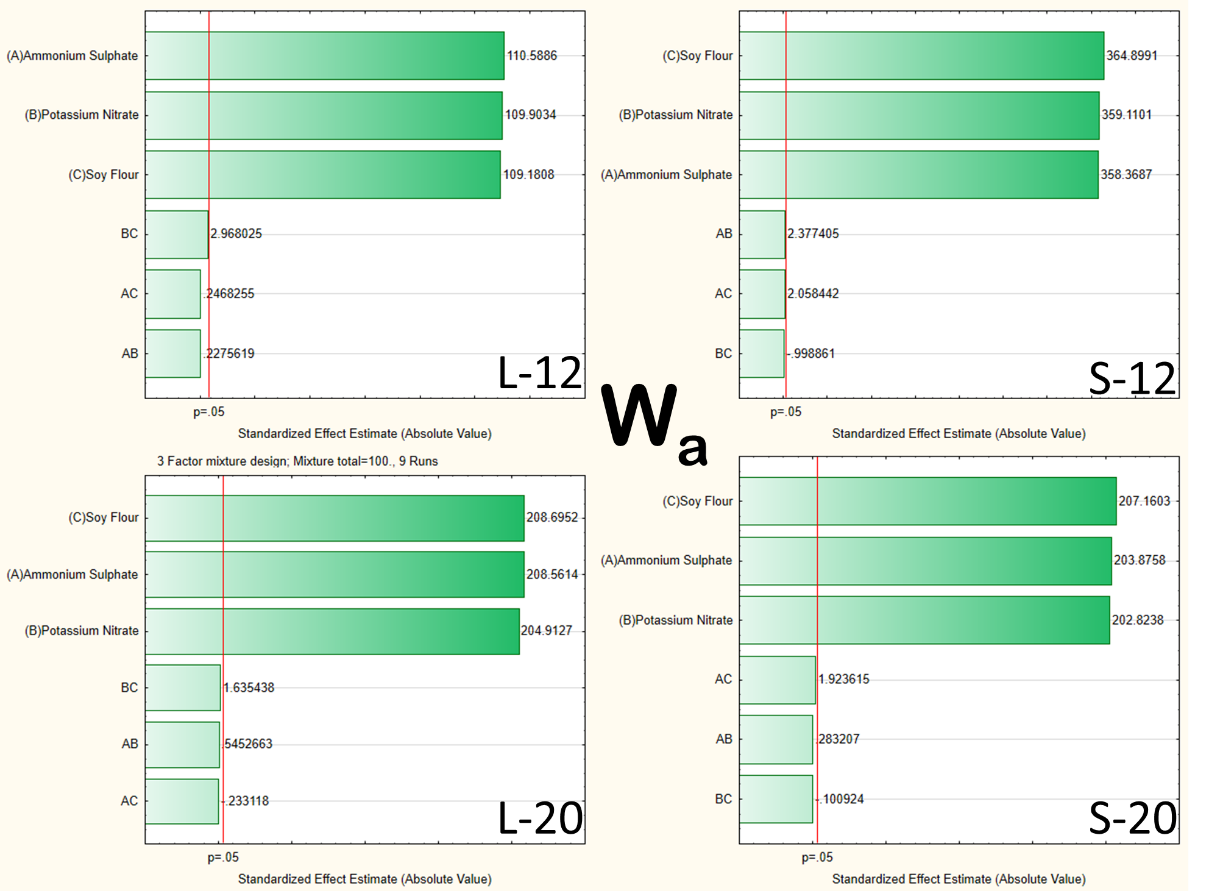


**Fig. S.6.** Pareto diagram for the studied treatments influence on Wa values using inoculum solid (S) or liquid (L) and time periods of 12 and 20 days


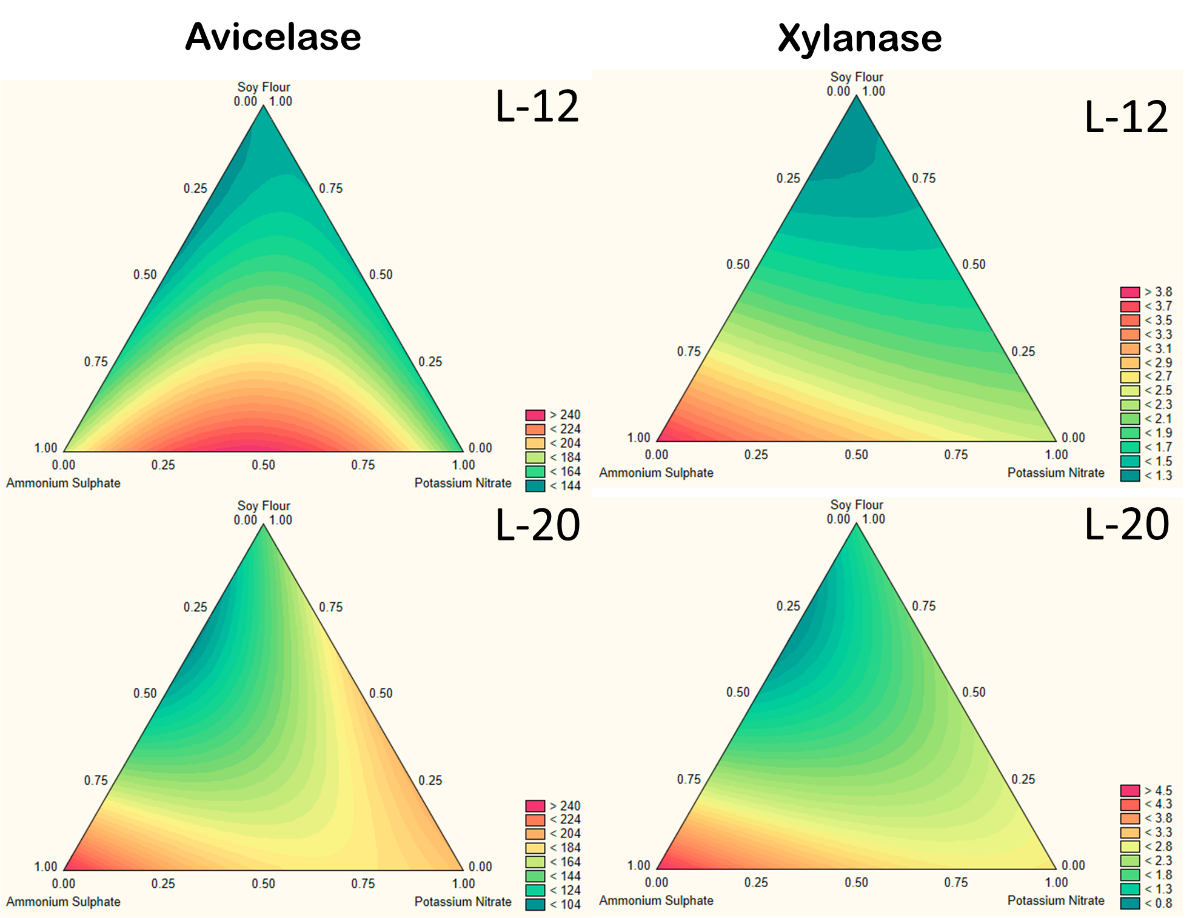


**Fig. S.7.** Surface contour plot of avicelase and xylanase activities under different treatments using the liquid (L) inoculum and time periods of 12 and 20 days.


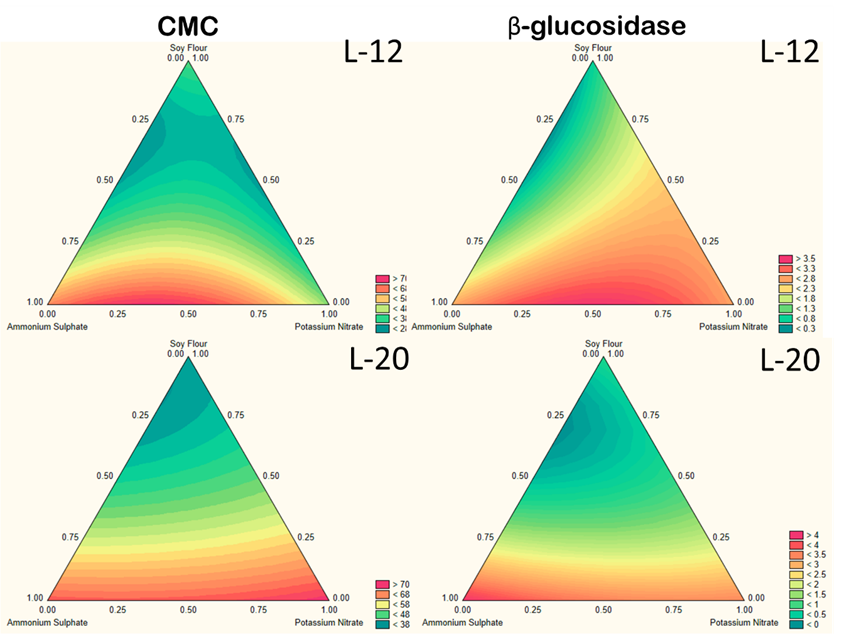


**Fig. S.8.** Surface contour plot of CMC and β-glucosidase activities under different treatments using the liquid (L) inoculum and time periods of 12 and 20 days.


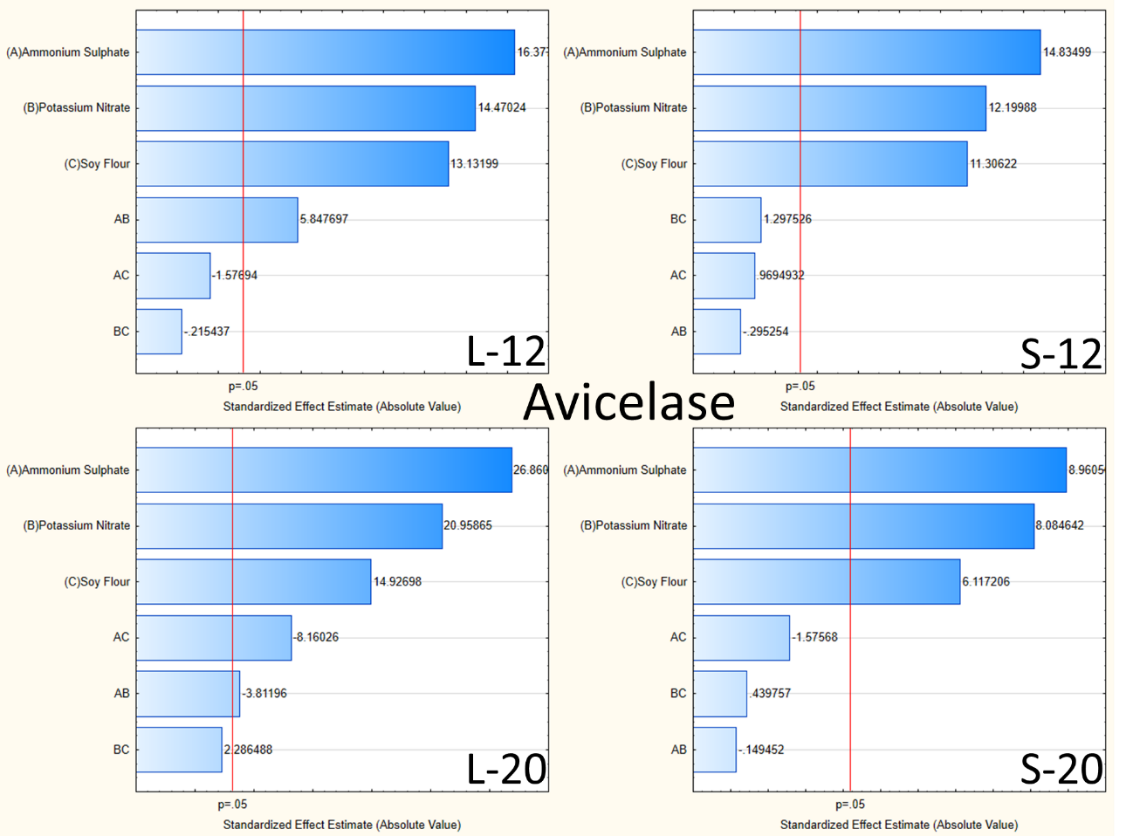


**Fig. S.9.** Pareto diagram for the studied treatments influence on enzymatic activity avicelase values using inoculum solid (S) or liquid (L) and time periods of 12 and 20 days


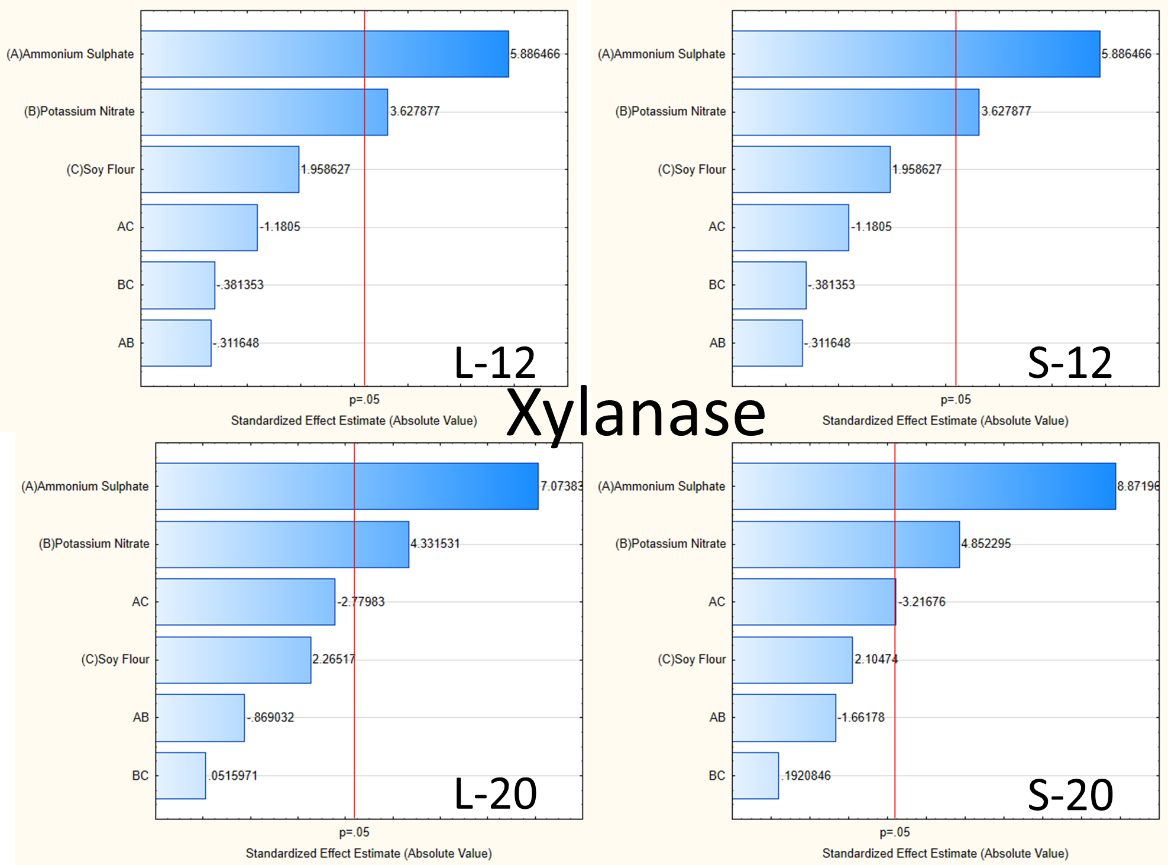


**Fig. S.10.** Pareto diagram for the studied treatments influence on enzymatic activity xylanase values using inoculum solid (S) or liquid (L) and time periods of 12 and 20 days


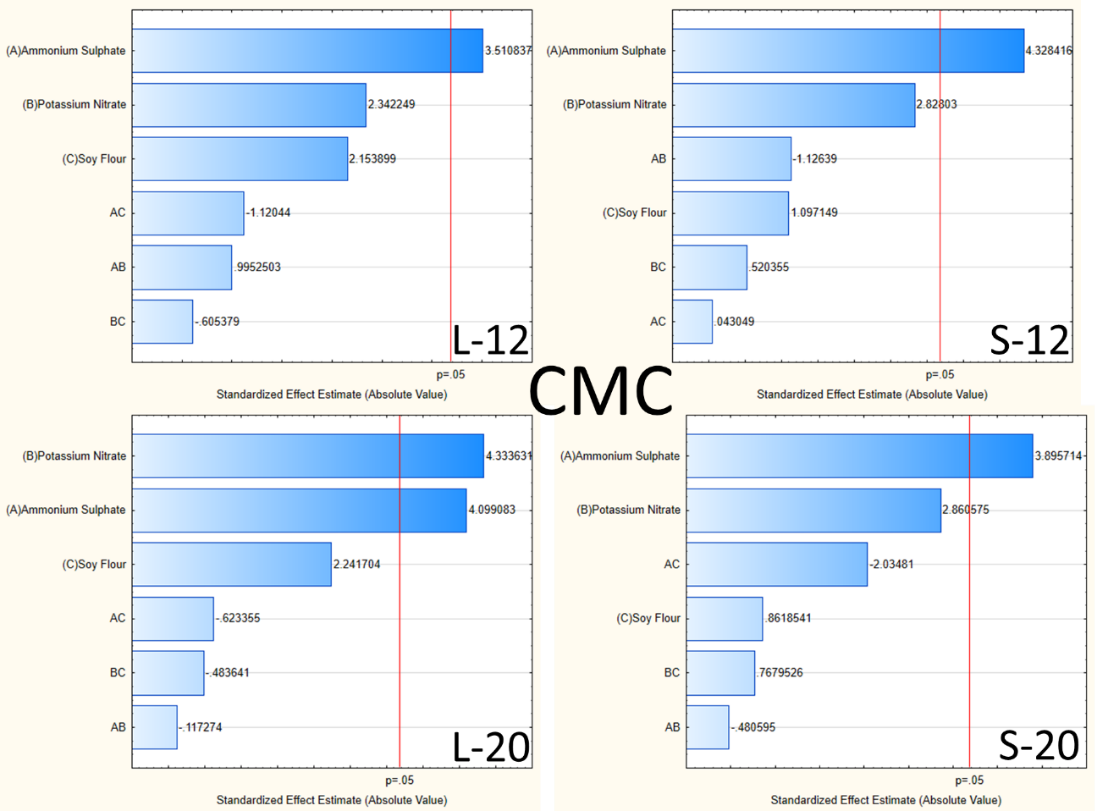


**Fig. S.11.** Pareto diagram for the studied treatments influence on enzymatic activity CMC values using inoculum solid (S) or liquid (L) and time periods of 12 and 20 days


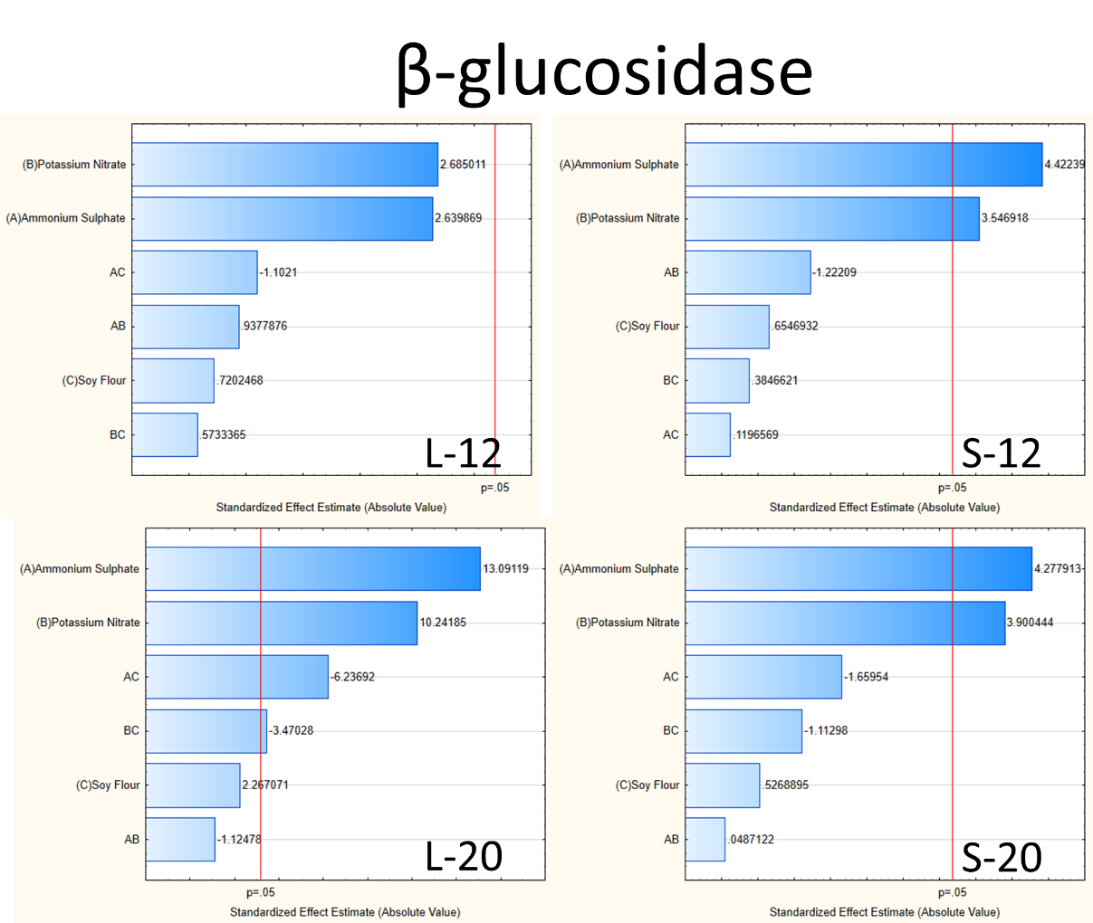


**Fig. S.12.** Pareto diagram for the studied treatments influence on enzymatic activity β-glucosidase values using inoculum solid (S) or liquid (L) and time periods of 12 and 20 days.


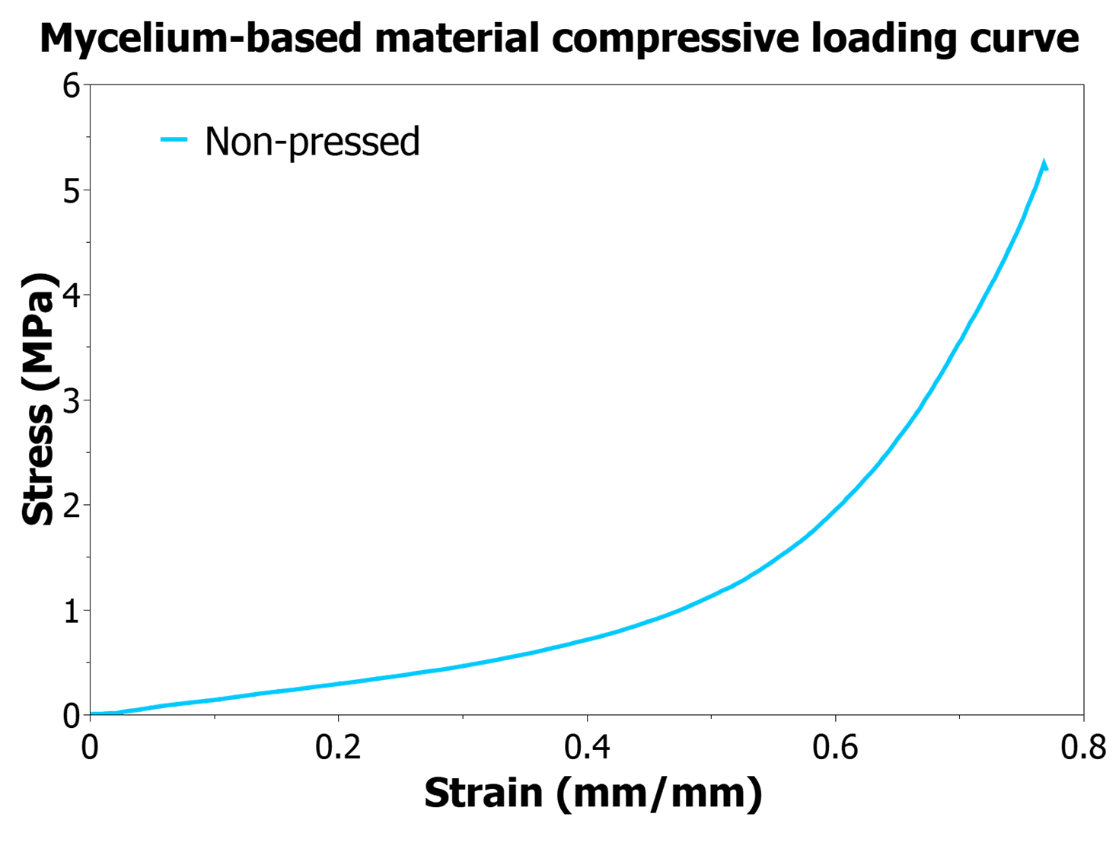


**Fig. S.13.** Compressive stress-strain response for the studied mycelium-based composite non-pressed sample.
